# Supplementary material
Source: Springer Nature journal article supplement (https://www.springermedizin.de/resource/supplementary/13054_2010_8639_MOESM7_ESM.pdf/9732436)

**TNFalpha**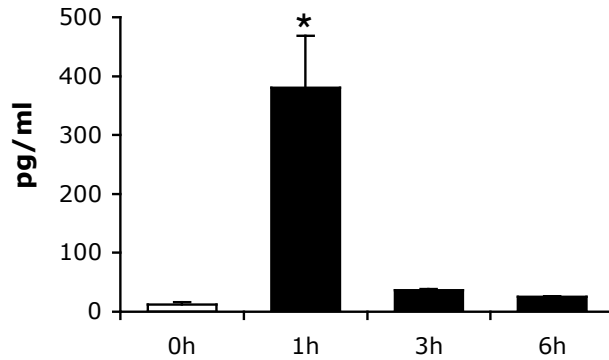**IL-1beta**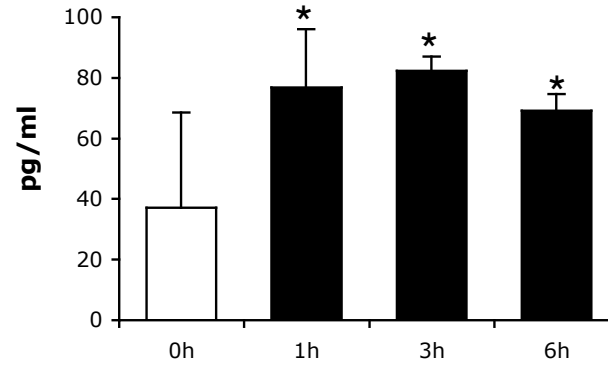**IL-6**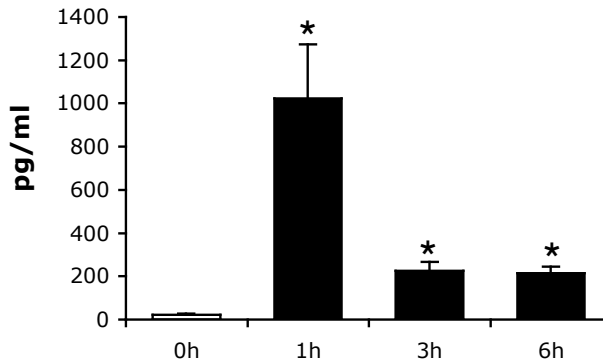**MIP-2**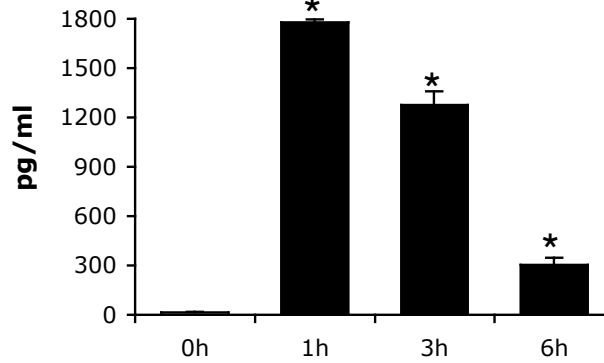**TREM-1**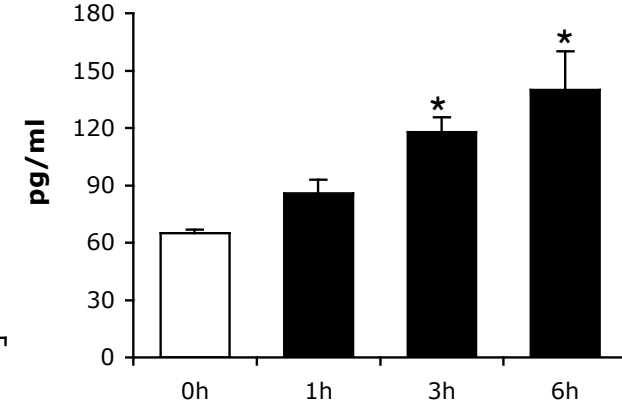**TNFalpha**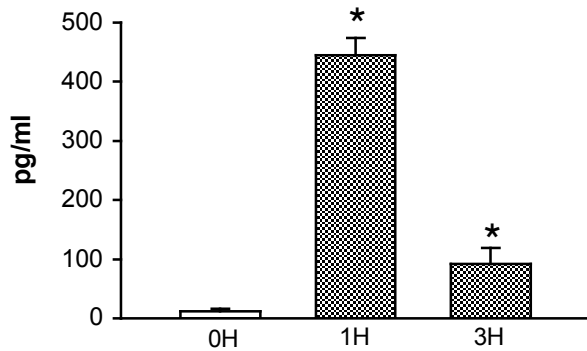**IL-6**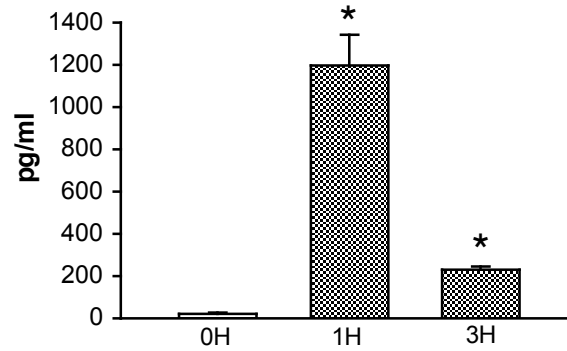**MIP-2**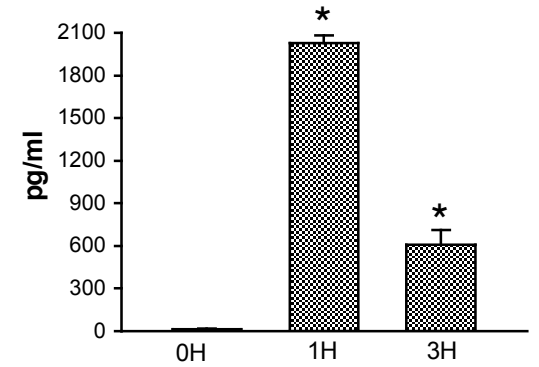

Supplement: MOESM7 [file 9732436]
